# Supplementary material for: Interruption of glucagon signaling augments islet non-alpha cell proliferation in SLC7A2- and mTOR-dependent manners
Source: PubMed Central journal article supplement — bioRxiv. 2024 Aug 7:2024.08.06.606926. Preprint. [Version 1] doi: 10.1101/2024.08.06.606926 (PMC11326219; doi:10.1101/2024.08.06.606926), 2024-08-07

594 Supplemental Figure 1. **Genetic interruption of glucagon signaling stimulates beta cell**  
595 **proliferation in pancreatic and transplanted mouse islets.** (A-B) Quantification of pancreatic  
596 islet beta cell proliferation in (A) 6 week-old  $Gcgr^{+/+}$  (black bar, all males) and  $Gcgr^{-/-}$  (red striped  
597 bar, all males) and (B) 8 week-old  $Gcgr^{+/+}$  (black bar) and  $Gcgr^{-/-}$  (red bar) mice (n=2-4 females  
598 and 3 males per group, unpaired t test, \*\*\*p < 0.001 versus  $Gcgr^{+/+}$ , \*p < 0.05 versus  $Gcgr^{+/+}$ ). (C)  
599 Schematic of approach for subcapsular renal transplantation of  $Gcgr^{+/+}$  (wild type, WT) donor  
600 islets into control ( $Gcgr^{Flox}$ ) or liver-specific  $Gcgr$  knockout ( $Gcgr^{Hep^{-/-}}$ ) recipient mice. Created  
601 with BioRender.com (D) Representative images of islet grafts from WT to Flox and WT to Hep<sup>-/-</sup>  
602 recipients after four weeks. Grafts are immunostained for insulin (green), Ki67 (red) and DAPI  
603 (blue). White arrows indicate Ki67+ insulin+ cells. Dashed yellow lines indicate kidney-graft

604 boundary. **(E)** Quantification of beta cell proliferation in transplanted islets from WT to Flox  
605 (black bar) and WT to Hep<sup>-/-</sup> (red striped bar) groups (n=4 males per group, unpaired t test, \*\*p <  
606 0.05 versus WT to Flox).

607

608 Supplemental Figure 2. SLC7A2-**dependent stimulated beta cell proliferation is islet**

609 **autonomous.** **(A)** Schematic of approach for subcapsular renal transplantation of *Slc7a2*<sup>+/+</sup>

610 (wild type, WT) and *Slc7a2*<sup>-/-</sup> (KO) donor islets into *Slc7a2*<sup>+/+</sup> (WT) recipient mice followed by

611 control IgG or GCGR-Ab treatment. Created with BioRender.com **(B)** Representative images of

612 *Slc7a2*<sup>+/+</sup> (upper row) and *Slc7a2*<sup>-/-</sup> (bottom row) islet grafts from *Slc7a2*<sup>+/+</sup> kidney capsules after

613 two weeks of IgG or GCGR-Ab treatment. Grafts are immunostained for insulin (green), Ki67

614 (red) and DAPI (blue). White arrows indicate Ki67+ insulin+ cells. Dashed yellow lines indicate

615 kidney-graft boundary. **(C)** Quantification of beta cell proliferation in transplanted islets from

616 *Slc7a2*<sup>+/+</sup> and *Slc7a2*<sup>-/-</sup> donors treated with IgG (black circles) or GCGR-Ab (blue circles; n=2

617 females and 2 males per treatment group, two-way ANOVA with Fisher's LSD test, \*\*p < 0.01

618 versus IgG treated). **(D)** Quantification of pancreatic islet beta cell mass in *Slc7a2*<sup>+/+</sup> (black bars)

619 and *Slc7a2*<sup>-/-</sup> (blue bars) IgG or GCGR-Ab-treated mice (n=2-5 females and 3-6 males per

620 group).

621

622

623

624

625

626

627

628

629

630

631

632 Supplemental Table 1: *Human Islet Donor Information.*  
633

| Donor ID | Age | Ethnicity/Race  | Sex | BMI (kg/m <sup>2</sup> ) | HbA1c (%) | Cause of Death           | Islet Source |
|----------|-----|-----------------|-----|--------------------------|-----------|--------------------------|--------------|
| AELC213  | 10  | Hispanic/Latino | F   | 25.4                     | N/A       | Head Trauma/Blunt Injury | Other        |
| AFEA331  | 45  | Black           | M   | 29.3                     | 5.0       | CVA/ stroke              | IIDP         |
| AIFV371  | 28  | Hispanic/Latino | F   | 24.7                     | 5.0       | CVA/ stroke              | HPAP         |
| 1        | 32  | N/A             | M   | 29.5                     | N/A       | N/A                      | IIDP         |
| 2        | 47  | N/A             | M   | 22.3                     | N/A       | N/A                      | IIDP         |
| 3        | 55  | N/A             | M   | 28.4                     | N/A       | N/A                      | IIDP         |
| 4        | 43  | N/A             | M   | 29.6                     | N/A       | N/A                      | IIDP         |
| 5        | 46  | N/A             | M   | 28.8                     | N/A       | N/A                      | IIDP         |
| 6        | 41  | N/A             | F   | 31.1                     | N/A       | N/A                      | IIDP         |
| 7        | 47  | N/A             | F   | 25.6                     | N/A       | N/A                      | IIDP         |
| 8        | 52  | N/A             | M   | 33.2                     | N/A       | N/A                      | IIDP         |

634  
635  
636  
637  
638

# Supplemental Figure 1

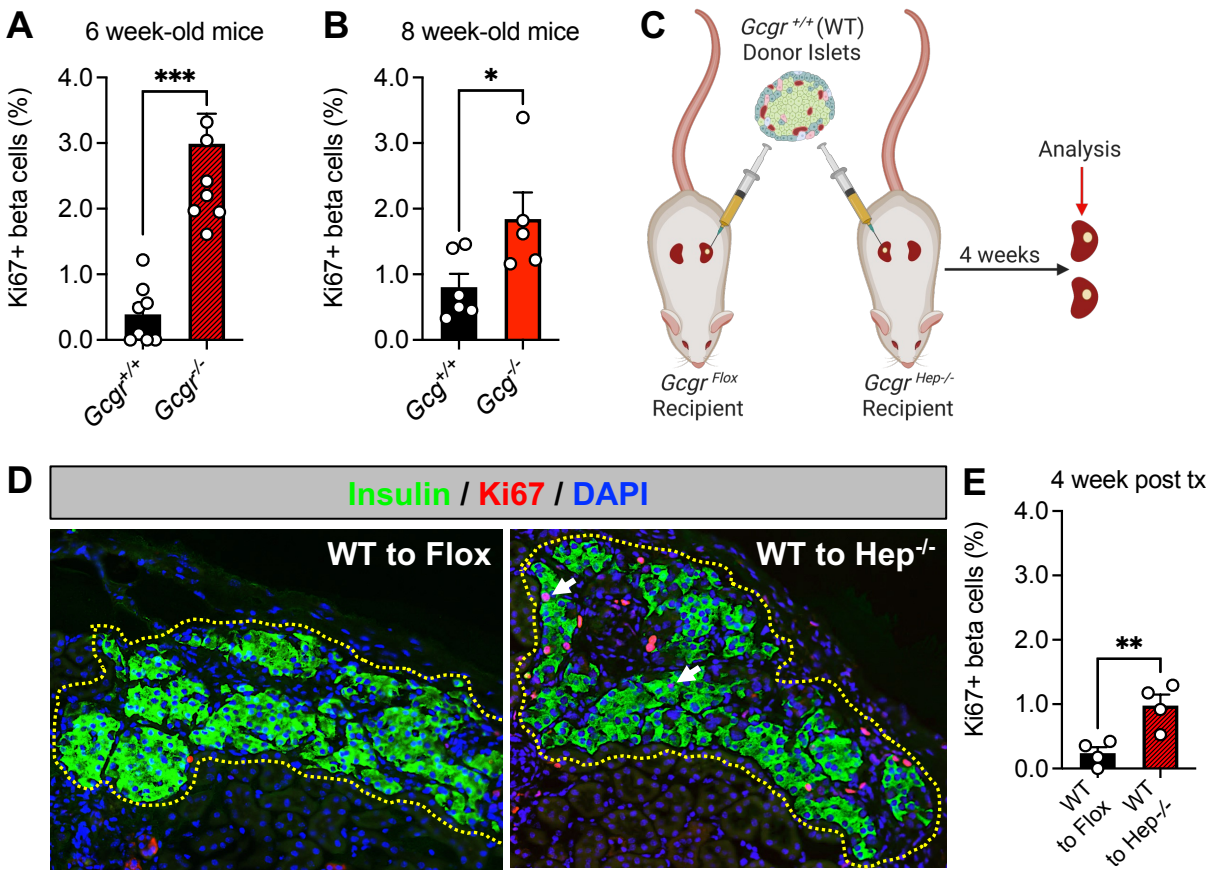

**Supp Fig 2: Slc7a2 is required for Gcgr-Ab-induced beta cell proliferation in transplanted mouse islets**

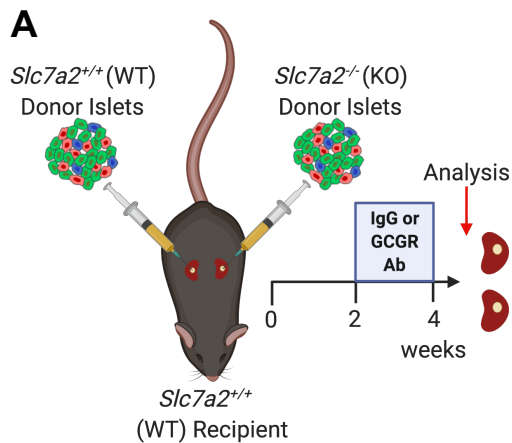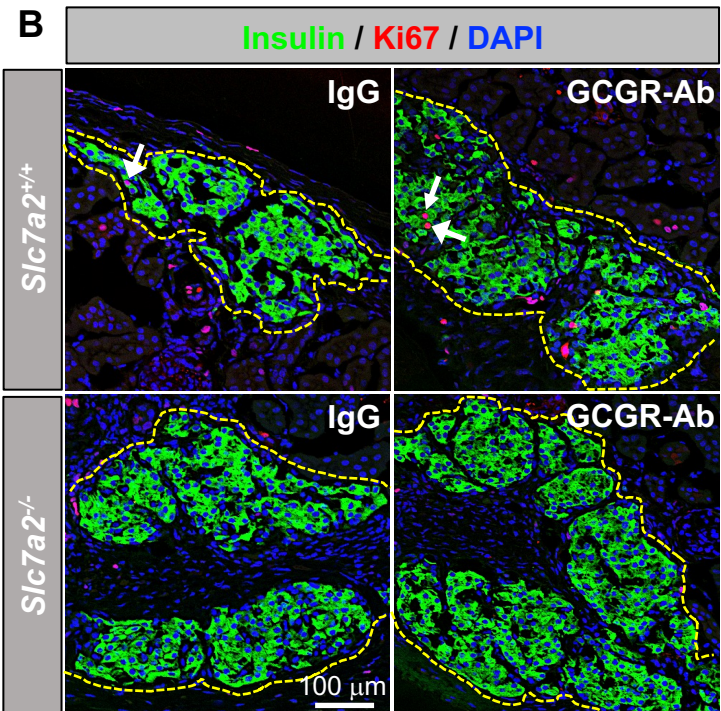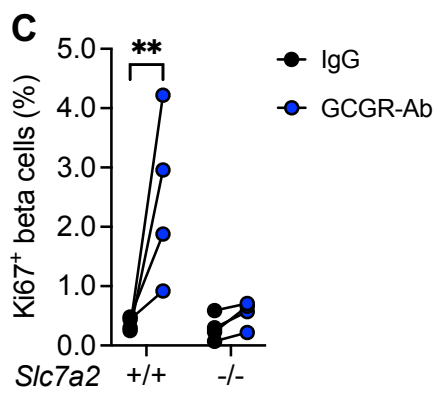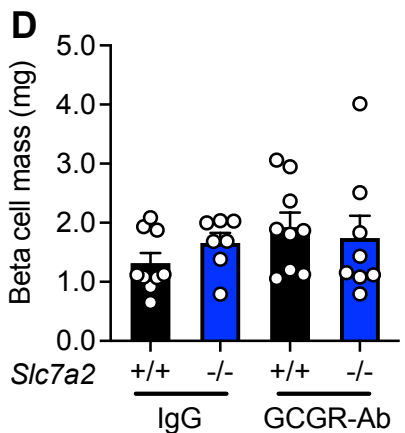

Supplement: NIHPP2024.08.06.606926v1-supplement-1.pdf [file NIHPP2024.08.06.606926v1-supplement-1.pdf]
